# Supplementary material for: Data Collection for the Fourth Multicentre Confidential Enquiry into Perioperative Equine Fatalities (CEPEF4) Study: New Technology and Preliminary Results
Source: Animals (Basel). 2021 Aug 30;11(9):2549. doi: 10.3390/ani11092549 (PMC8472153; doi:10.3390/ani11092549)
Supplement: Supplementary file 1 [file animals-11-02549-s001.zip › Supplementary Material S2 03.07.2021.pdf]

## Supplementary Material S2

### R scripts used in the data cleaning phase

- 1) To detect the following empty variables: `EMPTY=which(is.na(DATOS[i]))`
  - a. Date.
  - b. Species: horse, donkey, mule.
  - c. Sex: male, female.
  - d. Weight: kg.
  - e. BCS: normal, fat, thin.
  - f. ASA: 1, 2, 3, 4, 5.
  - g. Scheduled: scheduled, non scheduled, urgent.
  - h. Type: standing, INH, TIVA, PIVA.
  - i. Timetable: normal, out of hours.
  - j. Reason: description of the procedure.
  - k. Anaesthesia duration.
  - l. Induction method.
  - m. Recovery method.
  - n. Surgery duration (except diagnostic procedures).
  - o. Recovery duration (except standing sedations and when the patients die or are euthanised during premedication, induction, maintenance or recovery in the recovery box).
  - p. Recovery scores (except standing sedations and when the patients die or are euthanised during premedication, induction, maintenance or recovery in the recovery box).
- 2) To detect the following inconsistencies as wrong codified cases:
  - a. Type of anaesthesia
    - When coded as INH but with a CRI in the protocol  
`DATOS$CRI=="YES" & DATOS$TYPE=="INH" & DATOS$TRIPLE.DRIP=="NO"`
    - When coded as PIVA and there is not a CRI in the protocol  
`DATOS$CRI=="NO" & DATOS$TYPE=="PIVA"`
    - When coded as TIVA but there are not parenteral agents for maintenance  
  
`DATOS$TIVA=="NO" & DATOS$TYPE=="TIVA"`
    - When coded as standing sedations but general anaesthetics were used  
`DATOS$GA=="YES" & DATOS$TYPE=="STANDING"`
  - b. Protocol
    - When coded as TIVA but there is an inhalant agent during maintenance  
`DATOS$INH_MAIN=="YES" & DATOS$TYPE=="TIVA"`
    - When premedication was not coded  
`DATOS$PREM_DRUGS=="NONE"`
    - When induction in a general anaesthetic was not coded  
`DATOS$TYPE != "STANDING" & DATOS$IND_DRUGS=="NONE"`
    - When an inhalant agent was not coded in INH or PIVA  
`DATOS$TYPE != "STANDING" & DATOS$TYPE != "TIVA" & DATOS$INH_MAIN=="NO"`

-When cases were coded as induction with inhalant agents

DATOS\$ISOIND=="YES" | DATOS\$SEVOIND=="YES" | DATOS\$DESFIND=="YES"

c. Monitoring

-When coded as arterial/invasive monitoring but arterial line was not ticked

DATOS\$ARTERIAL!="SUCCESS" & DATOS\$ARTERIAL.PRESSURE=="YES"

-When invasive blood pressure was ticked in standing sedations

DATOS\$ARTERIAL.PRESSURE=="YES" & DATOS\$GA=="NO"

-When volatile agents were measured in TIVA

DATOS\$INHALATORY.GASES=="YES" & DATOS\$TIVA=="YES"

d. Standing surgeries

-When the box ETCO<sub>2</sub> was ticked in standing sedations

DATOS\$ETCO2=="YES" & DATOS\$GA=="NO"

-When the box FiO<sub>2</sub> was ticked in standing sedations

DATOS\$FIO2=="YES" & DATOS\$GA=="NO"

-When the box Vol. ag. was ticked in standing sedations

DATOS\$INHALATORY.GASES=="YES" & DATOS\$GA=="NO"

Abbreviations: ASA, American Society of Anaesthesiologists; BCS, body condition score; CRI, constant rate infusion; ETCO<sub>2</sub>, end-tidal carbon dioxide; FiO<sub>2</sub>, fraction of inspired oxygen; GA, general anaesthesia; INH, inhalation anaesthesia only; PIVA, partial intravenous anaesthesia; PREM, premedication; TIVA, total intravenous anaesthesia.
